# Supplementary material
Source: Springer Nature journal article supplement (https://www.springermedizin.de/resource/supplementary/12882_2012_531_MOESM1_ESM.pdf/9453754)
Supplement: MOESM1 [file 9453754]

DATABASE

180 patients

167 patients with a date of inclusion

25 excluded

10 prevalent patients referred to nephrology consultation prior July 1st, 2006

5 patients with serum creatinine <170 $\mu$ mol/L (men) or <150 $\mu$ mol/L (women)

1 patient with no planned nephrology consultation

9 patients refused to participate

STUDY COHORT

155 included patients
